# Supplementary material for: Type 2 myocardial infarction and myocardial injury: eligibility for novel medical therapy to derisk clinical trials
Source: PubMed Central journal article supplement — Open Heart. 2021 Jun 2;8(1):e001633. doi: 10.1136/openhrt-2021-001633 (PMC8174491; doi:10.1136/openhrt-2021-001633), 2021-06-02
Supplement: openhrt-2021-001633supp001.pdf [file openhrt-2021-001633supp001.pdf]

## **Supplement**

### **Type 2 Myocardial Infarction and Myocardial Injury: Eligibility for Novel Medical Therapy to De-risk Clinical Trials**

**Table 1 – Patient characteristics at initial screening (n = 346)**

|                                               | All endotypes | Type 1 MI   | Type 2 MI   | Myocardial injury - Cardiac | Myocardial injury - non-cardiac | P Value           |
|-----------------------------------------------|---------------|-------------|-------------|-----------------------------|---------------------------------|-------------------|
|                                               | n = 346       | n = 115     | n = 79      | n = 69                      | n = 83                          |                   |
| <b>Male, n (%)</b>                            | 183 (52.9%)   | 69 (37.7%)  | 37 (20.2%)  | 39 (21.3%)                  | 38 (20.8%)                      | 0.1               |
| <b>Age (IQR), years</b>                       | 70.0 (20.0)   | 68.0 (20.0) | 74.0 (19.0) | 72.0 (25.0)                 | 72.0 (21.0)                     | 0.150*            |
| <b>Caucasian ethnicity, n (%)<sup>1</sup></b> | 330 (95.4%)   | 107 (93.0%) | 76 (96.2%)  | 66 (95.7%)                  | 79 (95.2%)                      | 0.51              |
| <b>Duration of admission, days (IQR)</b>      | 5.0 (12.0)    | 3.0 (5.0)   | 7.0 (15.0)  | 6.0 (16.0)                  | 9.0 (10.0)                      | <b>&lt;0.001*</b> |
| <b>Initial troponin, ng/L (IQR)</b>           | 82.5 (301)    | 306 (2843)  | 66 (258)    | 58 (139)                    | 52 (70)                         | <b>&lt;0.001*</b> |
| <b>Peak troponin, ng/L (IQR)</b>              | 148 (349)     | 912 (7921)  | 112 (505)   | 79 (223)                    | 70 (105)                        | <b>0.012*</b>     |
| <b>History of smoking, n (%)</b>              | 200 (57.8%)   | 74 (64.3%)  | 41 (51.9%)  | 35 (50.7%)                  | 50 (60.2%)                      | 0.19              |
| <b>Obesity, n (%)</b>                         | 67 (19.4%)    | 22 (19.1%)  | 17 (21.5%)  | 9 (13.0%)                   | 19 (22.9%)                      | 0.446             |
| <b>Diabetes Mellitus, n (%)</b>               | 93 (26.9%)    | 36 (31.3%)  | 20 (25.3%)  | 12 (17.4%)                  | 25 (30.1%)                      | 0.183             |

|                                                       |             |            |            |            |            |                   |
|-------------------------------------------------------|-------------|------------|------------|------------|------------|-------------------|
| <b>Chronic Pulmonary Disease (not asthma) , n (%)</b> | 76 (22.0%)  | 22 (19.1%) | 19 (24.1%) | 12 (17.4%) | 23 (27.7%) | 0.365             |
| <b>Asthma, n (%)</b>                                  | 35 (10.1%)  | 6 (5.2%)   | 10 (12.7%) | 9 (13.0%)  | 10 (12.0%) | 0.205             |
| <b>Liver Disease, n (%)</b>                           | 5 (1.4%)    | 1 (0.9%)   | 3 (3.8%)   | 0 (0.0%)   | 1 (1.2%)   | 0.223             |
| <b>Chronic Neurological Disorder, n (%)</b>           | 15 (4.3%)   | 4 (3.5%)   | 1 (1.3%)   | 3 (4.3%)   | 7 (8.4%)   | 0.147             |
| <b>Malignant Neoplasm, n (%)</b>                      | 37 (10.7%)  | 7 (6.1%)   | 12 (15.2%) | 8 (11.6%)  | 10 (12.0%) | 0.217             |
| <b>Chronic haematological disease, n (%)</b>          | 24 (7.0%)   | 4 (3.5%)   | 4 (5.1%)   | 8 (11.6%)  | 8 (9.6%)   | 0.125             |
| <b>Connective tissue disorder, n (%)</b>              | 20 (5.8%)   | 7 (6.1%)   | 4 (5.1%)   | 1 (1.4%)   | 8 (9.6%)   | 0.192             |
| <b>Dementia, n (%)</b>                                | 19 (5.5%)   | 5 (4.3%)   | 4 (5.1%)   | 3 (4.3%)   | 7 (8.4%)   | 0.599             |
| <b>Peripheral vascular disease, n (%)</b>             | 2 (0.6%)    | 0 (0.0%)   | 0 (0.0%)   | 1 (1.4%)   | 1 (1.2%)   | 0.456             |
| <b>Infection, n (%)</b>                               | 86 (24.9%)  | 8 (7.0%)   | 26 (32.9%) | 14 (20.3%) | 36 (43.4%) | <b>&lt;0.0005</b> |
| <b>COVID-19, n (%)</b>                                | 36 (10.4%)  | 0 (0.0%)   | 14 (17.7%) | 4 (5.8%)   | 18 (21.7%) | <b>&lt;0.0005</b> |
| <b>Renal impairment, n (%)</b>                        | 108 (31.2%) | 29 (25.2%) | 23 (29.1%) | 22 (31.9%) | 33 (39.8%) | 0.261             |
| <b>Anaemia, n (%)</b>                                 | 69 (19.9%)  | 11 (9.6%)  | 11 (13.9%) | 18 (26.1%) | 29 (34.9%) | <b>&lt;0.0005</b> |
| <b>Heart failure, n (%)</b>                           | 155 (44.8%) | 54 (47.0%) | 31 (39.2%) | 39 (56.5%) | 31 (37.3%) | 0.14              |
| <b>Structural heart disease, n (%)</b>                | 22 (6.4%)   | 7 (6.1%)   | 4 (5.1%)   | 11 (15.9%) | 0 (0.0%)   | <b>&lt;0.001</b>  |

|                                                           |                  |                  |                  |                  |                  |                   |
|-----------------------------------------------------------|------------------|------------------|------------------|------------------|------------------|-------------------|
| <b>Tachyarrhythmia, n (%)</b>                             | 49 (14.2%)       | 7 (6.1%)         | 18 (22.8%)       | 21 (30.4%)       | 3 (3.6%)         | <b>&lt;0.0005</b> |
| <b>Non-plaque rupture coronary event<sup>2</sup></b>      | 4 (1.2%)         | 2 (1.7%)         | 0 (0.0%)         | 2 (2.9%)         | 0 (0.0%)         | 0.254             |
| <b>Charlson comorbidity index, mean (IQR)</b>             | 4.0 (12.0)       | 3.5 (4.0)        | 5.0 (4.0)        | 4.0 (3.0)        | 5.0 (4.0)        | <b>0.015*</b>     |
| <b>Charlson 10-year life expectancy index, mean (IQR)</b> | 53.0%<br>(75.0%) | 65.0%<br>(88.0%) | 21.0%<br>(77.0%) | 53.0%<br>(75.0%) | 21.0%<br>(77.0%) | <b>0.027*</b>     |
| <b>In-hospital mortality, n (%)</b>                       | 55 (15.9%)       | 9 (7.8%)         | 18 (22.8%)       | 8 (11.6%)        | 20 (24.1%)       | <b>0.004</b>      |
| <b>Revascularisation, n (%)</b>                           | 53 (15.3%)       | 52 (45.2%)       | 0 (0.0%)         | 1 (1.4%)         | 0 (0.0%)         | <b>&lt;0.0005</b> |
| <b>Coronary angiography, n (%)</b>                        | 70 (20.2%)       | 64 (55.7%)       | 1 (1.3%)         | 4 (5.8%)         | 1 (1.2%)         | <b>&lt;0.0005</b> |
| <b>Coronary artery bypass grafting, n (%)</b>             | 4 (1.2%)         | 4 (3.5%)         | 0 (0.0%)         | 0 (0.0%)         | 0 (0.0%)         | 0.085             |
| <b>Survivors with unplanned readmission~ (n = 293)</b>    | 63 (18.2%)       | 20 (17.4%)       | 13 (16.5%)       | 14 (20.3%)       | 16 (19.3%)       | 0.924             |
| <b>Days until unplanned readmission (n = 63) (IQR)</b>    | 19.0 (25.0)      | 23.0 (23.0)      | 16.0 (24.0)      | 18.0 (21.0)      | 24.0 (30.0)      | 0.949*            |

P values provided for comparison between endotypes. Significance set at <0.05 for 95% Confidence. Chi-square for nominal categorical variables; \*Kruskal-Wallis one-way ANOVA for continuous numerical variables. <sup>1</sup>Ethnicity includes 3 Arab patients, 3 South Asian patients and 12 West Asian patients with no statistically significant difference across all groups (p = 0.51). <sup>2</sup>Non-plaque rupture coronary event: coronary embolus, coronary dissection, coronary spasm

**Table 2 – Pre-admission and discharge prescribed medications regardless of eligibility for trial**

|                                          | Pre-admission therapy<br>n = 231 |              | Therapy on discharge<br>n = 185 |              | P Value*     |
|------------------------------------------|----------------------------------|--------------|---------------------------------|--------------|--------------|
| <b>Beta-blocker</b>                      | <b>69</b>                        | <b>29.9%</b> | <b>77</b>                       | <b>41.6%</b> | <b>0.002</b> |
| <b>Anti-platelet<sup>1</sup></b>         | <b>67</b>                        | <b>29.0%</b> | <b>70</b>                       | <b>37.8%</b> | <b>0.003</b> |
| <b>Statin</b>                            | 97                               | 42.0%        | 85                              | 45.9%        | 0.075        |
| <b>Colchicine</b>                        | 0                                | 0.0%         | 4                               | 2.2%         | 0.083        |
| <b>MRA<sup>2</sup></b>                   | 12                               | 5.2%         | 22                              | 11.9%        | 0.114        |
| <b>ACE-I<sup>3</sup>/ARB<sup>4</sup></b> | 71                               | 30.7%        | 64                              | 34.6%        | 0.789        |

\*Fisher's Exact Test with two-tailed, 95% significance. <sup>1</sup>Aspirin, Ticagrelor,

Clopidogrel. <sup>2</sup>Mineralocorticoid receptor antagonist. <sup>3</sup>Angiotensin-converting

enzyme inhibitor. <sup>4</sup>Angiotensin II receptor antagonist.

**Table 3 – Eligibility for treatment with colchicine**

| <b>Eligibility for inclusion</b> |                                                                                                                                                                                                                                                                                                                                                                                                                                                                                           | <b>Initial cohort</b><br>n = 210 |            | <b>Discharge cohort</b><br>n = 174 |            |
|----------------------------------|-------------------------------------------------------------------------------------------------------------------------------------------------------------------------------------------------------------------------------------------------------------------------------------------------------------------------------------------------------------------------------------------------------------------------------------------------------------------------------------------|----------------------------------|------------|------------------------------------|------------|
| 1                                | Males & Females aged greater than 18 years able to consent                                                                                                                                                                                                                                                                                                                                                                                                                                | 193                              | 91.9%      | 157                                | 90.2%      |
| 2                                | A diagnosis of type 2 MI or acute myocardial injury presenting within the last 30 days                                                                                                                                                                                                                                                                                                                                                                                                    | 210                              | 100.0<br>% | 174                                | 100.0<br>% |
| 3                                | If patient is female, patient is either not of childbearing potential, defined as postmenopausal for at least 1 year or surgically sterile, or is of childbearing potential and practicing at least one method of contraception and preferably two complementary forms of contraception including a barrier method (e.g. male or female condoms, spermicides, sponges, foams, jellies, diaphragm, intrauterine device (IUD)) throughout the study and for 30 days after study completion; | 192                              | 91.4%      | 158                                | 90.8%      |

|                                                   |                                                                                                                                                                                                                                                                  |                           |       |                                |       |
|---------------------------------------------------|------------------------------------------------------------------------------------------------------------------------------------------------------------------------------------------------------------------------------------------------------------------|---------------------------|-------|--------------------------------|-------|
| 4                                                 | History of cardiovascular disease<br><br>(NB A history of cardiovascular disease includes hypertension, ischaemic heart disease or cerebrovascular disease.                                                                                                      | 134                       | 63.8% | 114                            | 65.5% |
| 5                                                 | Patient must be treated according to national guidelines (including anti-platelet therapy, statin, renin-angiotensin-aldosterone system (RAAS) inhibitor (preferably angiotensin converting-enzyme (ACE) inhibitor) and beta-blocker, as clinically appropriate; | 71                        | 33.8% | 63                             | 36.2% |
| 6                                                 | Patient must be able and willing to comply with the requirements of this study protocol.                                                                                                                                                                         | 145                       | 69.0% | 141                            | 81.0% |
| <b>Colchicine trial exclusion factors (SMPC*)</b> |                                                                                                                                                                                                                                                                  | Initial cohort<br>n = 210 |       | Discharge<br>cohort<br>n = 174 |       |
| Absolute contraindication                         |                                                                                                                                                                                                                                                                  |                           |       |                                |       |
| 1                                                 | Cancer or lymphoproliferative disease within the last 3 years, other than a successfully treated non-metastatic cutaneous squamous cell or basal cell carcinoma and/or localized carcinoma in situ of the cervix;                                                | 22                        | 10.5% | 19                             | 10.9% |
| 2                                                 | Gastrointestinal disease - Inflammatory bowel disease (Crohn's disease or ulcerative colitis) or patient with chronic diarrhoea;                                                                                                                                 | 2                         | 1.0%  | 1                              | 0.6%  |

|                                   |                                                                                                                                                                                                                                                                                                                                                                                                                                |    |       |    |       |
|-----------------------------------|--------------------------------------------------------------------------------------------------------------------------------------------------------------------------------------------------------------------------------------------------------------------------------------------------------------------------------------------------------------------------------------------------------------------------------|----|-------|----|-------|
| 3                                 | Blood disorders - Significantly abnormal blood results determined to be non-transient through repeat testing during the past 30 days: - haemoglobin < 115g/L, - white blood cell count < 3.0 X 10 <sup>9</sup> /L, - platelet count <110 X 10 <sup>9</sup> /L, - ALT > 3 times the upper limit of normal (ULN), - total bilirubin > 2 times ULN (unless due to Gilbert syndrome, which is allowed) - Creatinine > 2 times ULN; | 50 | 23.8% | 40 | 23.0% |
| 4                                 | Cirrhosis, chronic active hepatitis or severe hepatic disease;                                                                                                                                                                                                                                                                                                                                                                 | 3  | 1.4%  | 2  | 1.1%  |
| 5                                 | Female patient who is pregnant, or breast-feeding or is considering becoming pregnant during the study or for 6 months after the last dose of study medication                                                                                                                                                                                                                                                                 | 0  | 0.0%  | 0  | 0.0%  |
| 6                                 | Currently taking colchicine for other indications (mainly chronic indications represented by Familial Mediterranean Fever or gout).                                                                                                                                                                                                                                                                                            | 0  | 0.0%  | 0  | 0.0%  |
| 7                                 | Allergic reaction or significant sensitivity to colchicine;                                                                                                                                                                                                                                                                                                                                                                    | 1  | 0.5%  | 1  | 0.6%  |
| 8                                 | eGFR less than 10 mL/ minute/1.73 m <sup>2</sup> (BNF caution)                                                                                                                                                                                                                                                                                                                                                                 | 19 | 9.0%  | 18 | 10.3% |
| Relative contraindication/caution |                                                                                                                                                                                                                                                                                                                                                                                                                                |    |       |    |       |
| 9                                 | New York Heart Association Class III-IV heart failure                                                                                                                                                                                                                                                                                                                                                                          | 15 | 7.1%  | 14 | 8.0%  |
| 10                                | Left ventricular ejection fraction of less than 35%,                                                                                                                                                                                                                                                                                                                                                                           | 21 | 10.0% | 20 | 11.5% |
| 11                                | Recent stroke (within the past 3 months),                                                                                                                                                                                                                                                                                                                                                                                      | 5  | 2.4%  | 3  | 1.7%  |



|                |                                                                                                                                                                                                                                                  |     |       |     |       |
|----------------|--------------------------------------------------------------------------------------------------------------------------------------------------------------------------------------------------------------------------------------------------|-----|-------|-----|-------|
| 12             | Pneumonia                                                                                                                                                                                                                                        | 41  | 19.5% | 20  | 11.5% |
| 13             | Poorly controlled medical condition                                                                                                                                                                                                              | 6   | 2.9%  | 5   | 2.9%  |
| 14             | Cardiogenic shock or with hemodynamic instability                                                                                                                                                                                                | 5   | 2.4%  | 3   | 1.7%  |
| 15             | Pre-existent progressive neuromuscular disease or patient with CPK level > 3 times the upper limit of normal (unless due to MI, which is allowed) as measured within the past 30 days and determined to be non-transient through repeat testing; | 1   | 0.5%  | 0   | 0.0%  |
| 16             | Currently using or intended chronic systemic steroid therapy (oral or intravenous)                                                                                                                                                               | 13  | 6.2%  | 11  | 6.3%  |
| 17             | Elderly (65 years or older) (BNF caution)                                                                                                                                                                                                        | 134 | 63.8% | 113 | 64.9% |
| Study reason** |                                                                                                                                                                                                                                                  |     |       |     |       |
| 18             | Clinically significant drug or alcohol abuse in the last year                                                                                                                                                                                    | 7   | 3.3%  | 7   | 4.0%  |
| 19             | Research study medication <30 days or 5 half-lives prior to the Screening visit (whichever is longer);                                                                                                                                           | 2   | 1.0%  | 1   | 0.6%  |
| 20             | Patient is considered by the investigator, for any reason, to be an unsuitable candidate for the study.                                                                                                                                          | 58  | 27.6% | 29  | 16.7% |

\*Summary of Medicinal Product Characteristics <https://www.medicines.org.uk/emc/product/6415/smpc>

\*\* Study reason – colchicine has a narrow therapeutic index. Recent clinical trials [14] have included additional exclusion criteria to reduce the possibility of toxicity arising from treatment with colchicine. Accordingly, these criteria were also evaluated in this study.

**Table 4 – Eligibility for treatment with eplerenone**

| <b>Eligibility for inclusion</b> |                                                                                                                                                                                                                                                                                                                                                                                                                                                                                           | <b>Initial cohort</b><br>n = 210 |            | <b>Discharge cohort</b><br>n = 174 |            |
|----------------------------------|-------------------------------------------------------------------------------------------------------------------------------------------------------------------------------------------------------------------------------------------------------------------------------------------------------------------------------------------------------------------------------------------------------------------------------------------------------------------------------------------|----------------------------------|------------|------------------------------------|------------|
| 1                                | Males & Females aged greater than 18 years able to consent                                                                                                                                                                                                                                                                                                                                                                                                                                | 193                              | 91.9%      | 157                                | 90.2%      |
| 2                                | A diagnosis of Type 2 MI or acute myocardial injury presenting within the last 30 days                                                                                                                                                                                                                                                                                                                                                                                                    | 210                              | 100.0<br>% | 174                                | 100.0<br>% |
| 3                                | If patient is female, patient is either not of childbearing potential, defined as postmenopausal for at least 1 year or surgically sterile, or is of childbearing potential and practicing at least one method of contraception and preferably two complementary forms of contraception including a barrier method (e.g. male or female condoms, spermicides, sponges, foams, jellies, diaphragm, intrauterine device (IUD)) throughout the study and for 30 days after study completion; | 192                              | 91.4%      | 158                                | 90.8%      |

|                                                                    |                                                                                                                                                                                                                                                                  |                                  |       |                                    |       |
|--------------------------------------------------------------------|------------------------------------------------------------------------------------------------------------------------------------------------------------------------------------------------------------------------------------------------------------------|----------------------------------|-------|------------------------------------|-------|
| 4                                                                  | History of cardiovascular disease<br><br>(NB A history of cardiovascular disease includes hypertension, ischaemic heart disease or cerebrovascular disease.                                                                                                      | 134                              | 63.8% | 114                                | 65.5% |
| 5                                                                  | Patient must be treated according to national guidelines (including anti-platelet therapy, statin, renin-angiotensin-aldosterone system (RAAS) inhibitor (preferably angiotensin converting-enzyme (ACE) inhibitor) and beta-blocker, as clinically appropriate; | 71                               | 33.8% | 63                                 | 36.2% |
| 6                                                                  | Patient must be able and willing to comply with the requirements of this study protocol.                                                                                                                                                                         | 145                              | 69.0% | 141                                | 81.0% |
| <b>Eplerenone exclusion or caution criteria (SMPC* CI/Caution)</b> |                                                                                                                                                                                                                                                                  | <b>Initial cohort</b><br>n = 210 |       | <b>Discharge cohort</b><br>n = 174 |       |
| Absolute contraindication                                          |                                                                                                                                                                                                                                                                  |                                  |       |                                    |       |
| 1                                                                  | Hyperkalaemia                                                                                                                                                                                                                                                    | 16                               | 6.9%  | 12                                 | 6.9%  |
| 2                                                                  | eGFR less than 30ml/min/1.73 m <sup>2</sup>                                                                                                                                                                                                                      | 45                               | 19.5% | 33                                 | 19.0% |
| 3                                                                  | Severe hepatic impairment                                                                                                                                                                                                                                        | 1                                | 0.4%  | 1                                  | 0.6%  |
| Relative contraindication/caution                                  |                                                                                                                                                                                                                                                                  |                                  |       |                                    |       |

|   |         |     |       |     |       |
|---|---------|-----|-------|-----|-------|
| 4 | Elderly | 128 | 55.4% | 109 | 62.6% |
|---|---------|-----|-------|-----|-------|

\*Summary of Medicinal Product Characteristics <https://www.medicines.org.uk/emc/product/1981/smpc>

**Table 5 – Eligibility for treatment with Ticagrelor**

| Eligibility for inclusion |                                                                                                                                                                                                                                                                                                                                                                                                                                                                                           | Initial cohort<br>n = 210 |            | Discharge cohort<br>n = 174 |            |
|---------------------------|-------------------------------------------------------------------------------------------------------------------------------------------------------------------------------------------------------------------------------------------------------------------------------------------------------------------------------------------------------------------------------------------------------------------------------------------------------------------------------------------|---------------------------|------------|-----------------------------|------------|
| 1                         | Males & Females aged greater than 18 years able to consent                                                                                                                                                                                                                                                                                                                                                                                                                                | 193                       | 91.9%      | 157                         | 90.2%      |
| 2                         | A diagnosis of Type 2 MI or acute myocardial injury presenting within the last 30 days                                                                                                                                                                                                                                                                                                                                                                                                    | 210                       | 100.0<br>% | 174                         | 100.0<br>% |
| 3                         | If patient is female, patient is either not of childbearing potential, defined as postmenopausal for at least 1 year or surgically sterile, or is of childbearing potential and practicing at least one method of contraception and preferably two complementary forms of contraception including a barrier method (e.g. male or female condoms, spermicides, sponges, foams, jellies, diaphragm, intrauterine device (IUD)) throughout the study and for 30 days after study completion; | 192                       | 91.4%      | 158                         | 90.8%      |

|                                                                    |                                                                                                                                                                                                                                                                  |                                  |       |                                    |       |
|--------------------------------------------------------------------|------------------------------------------------------------------------------------------------------------------------------------------------------------------------------------------------------------------------------------------------------------------|----------------------------------|-------|------------------------------------|-------|
| 4                                                                  | History of cardiovascular disease<br><br>(NB A history of cardiovascular disease includes hypertension, ischaemic heart disease or cerebrovascular disease.                                                                                                      | 134                              | 63.8% | 114                                | 65.5% |
| 5                                                                  | Patient must be treated according to national guidelines (including anti-platelet therapy, statin, renin-angiotensin-aldosterone system (RAAS) inhibitor (preferably angiotensin converting-enzyme (ACE) inhibitor) and beta-blocker, as clinically appropriate; | 71                               | 33.8% | 63                                 | 36.2% |
| 6                                                                  | Patient must be able and willing to comply with the requirements of this study protocol.                                                                                                                                                                         | 145                              | 69.0% | 141                                | 81.0% |
| <b>Ticagrelor exclusion or caution criteria (SMPC* CI/Caution)</b> |                                                                                                                                                                                                                                                                  | <b>Initial cohort</b><br>n = 210 |       | <b>Discharge cohort</b><br>n = 174 |       |
| Absolute contraindication                                          |                                                                                                                                                                                                                                                                  |                                  |       |                                    |       |
| 1                                                                  | Active bleeding                                                                                                                                                                                                                                                  | 7                                | 3.0%  | 5                                  | 2.9%  |
| 2                                                                  | History of intracranial haemorrhage                                                                                                                                                                                                                              | 5                                | 2.2%  | 2                                  | 1.1%  |
| 3                                                                  | Hepatic impairment (severe)                                                                                                                                                                                                                                      | 1                                | 0.4%  | 1                                  | 0.6%  |
| 4                                                                  | Pregnancy or breast feeding                                                                                                                                                                                                                                      | 0                                | 0.0%  | 0                                  | 0.0%  |

| Relative contraindication / caution |                                                      |    |       |    |       |
|-------------------------------------|------------------------------------------------------|----|-------|----|-------|
| 5                                   | Asthma                                               | 19 | 8.2%  | 14 | 8.0%  |
| 6                                   | Bradycardia (without pacemaker)                      | 3  | 1.3%  | 3  | 1.7%  |
| 7                                   | COPD                                                 | 29 | 12.6% | 24 | 13.8% |
| 8                                   | Hyperuricaemia                                       | 10 | 4.3%  | 8  | 4.6%  |
| 9                                   | Increased risk of bleeding                           | 16 | 6.9%  | 15 | 8.6%  |
| 10                                  | Second- or third-degree AV block (without pacemaker) | 3  | 1.3%  | 3  | 1.7%  |
| 11                                  | Sick sinus syndrome (without pacemaker)              | 0  | 0.0%  | 0  | 0.0%  |
| 12                                  | Hepatic impairment (moderate)                        | 0  | 0.0%  | 0  | 0.0%  |

\*Summary of Medicinal Product Characteristics <https://www.medicines.org.uk/emc/product/5767/smpc>
